# Supplementary material
Source: PubMed Central journal article supplement (PMC4462673)

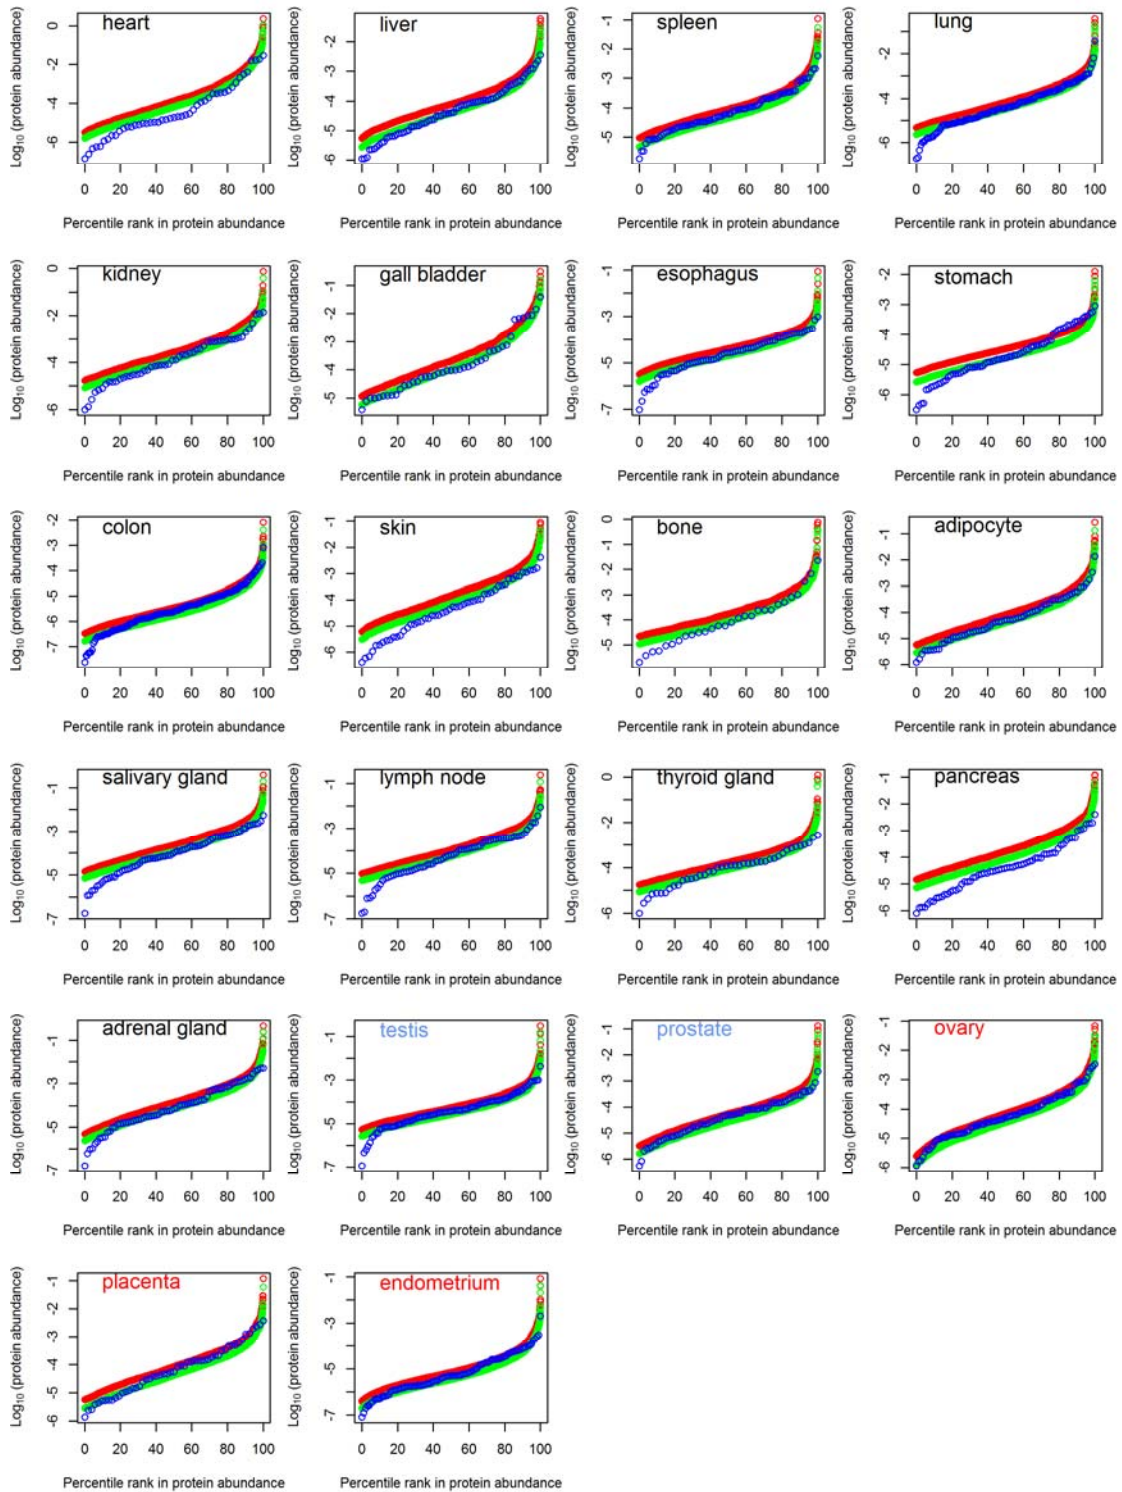

Figure S1

Supplement: supp_msv036_Figure_S1.pdf [file supp_msv036_Figure_S1.pdf]

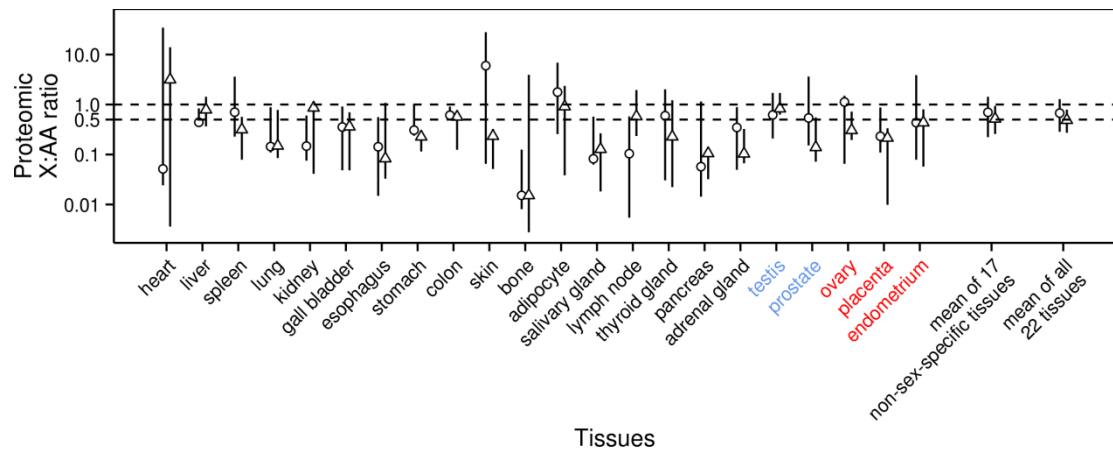

**Figure S2**

Supplement: supp_msv036_Figure_S2.pdf [file supp_msv036_Figure_S2.pdf]

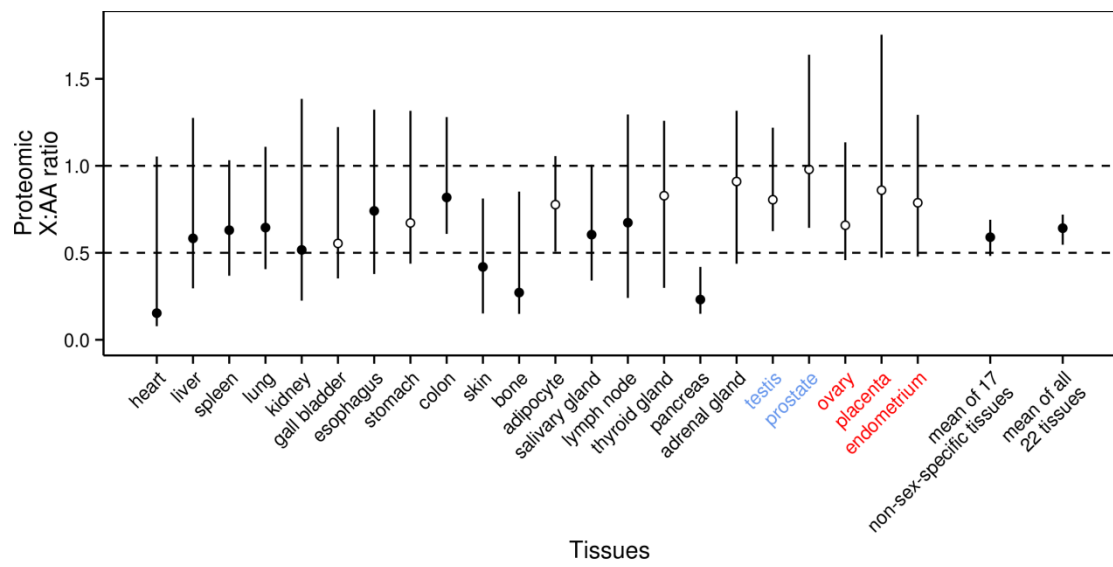

**Figure S3**

Supplement: supp_msv036_Figure_S3.pdf [file supp_msv036_Figure_S3.pdf]
